# Supplementary material for: Facile one-pot synthesis of Mg-doped g-C3N4 for photocatalytic reduction of CO2
Source: Royal Society of Chemistry journal article supplement (doi:10.1039/c9ra04606b), 2019-01-01
Supplement: c9ra04606b1.pdf [file c9ra04606b1.pdf]

**Facile one-pot synthesis of Mg-doped g-C<sub>3</sub>N<sub>4</sub> for photocatalytic  
reduction of CO<sub>2</sub>**

Xinyue Dong<sup>1</sup>, Suicai Zhang<sup>2</sup>, Hualin Wu<sup>2</sup>, Zhuo Kang<sup>23\*</sup>, Li Wang<sup>14\*</sup>

**Fig.S1. EDX spectrum of the Mg-CN-4% sample**

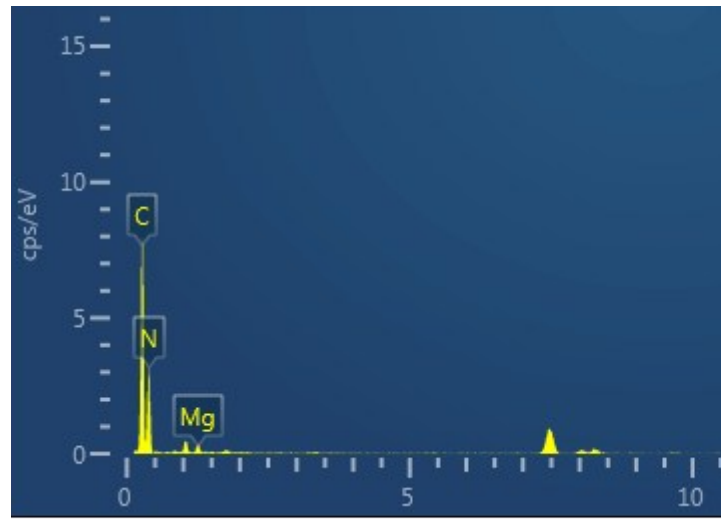

| Element | Line Type | k factor | Absorption Correction | Wt%    | Wt% Sigma |
|---------|-----------|----------|-----------------------|--------|-----------|
| C       | K series  | 2.50675  | 1.00                  | 65.62  | 0.92      |
| N       | K series  | 3.14061  | 1.00                  | 32.86  | 0.92      |
| Mg      | K series  | 1.06408  | 1.00                  | 1.52   | 0.15      |
| Total:  |           |          |                       | 100.00 |           |

**Fig.S2. N1s high-resolutions of g-C<sub>3</sub>N<sub>4</sub> and Mg-CN-4%**

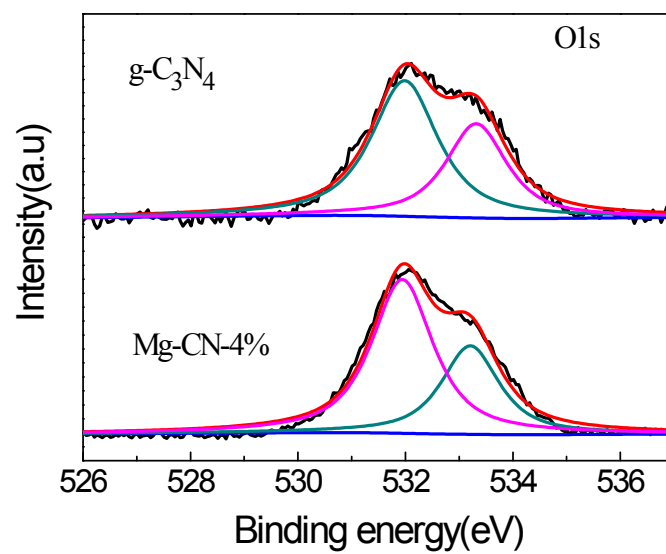

**Fig.S2. N1s high-resolutions of g-C<sub>3</sub>N<sub>4</sub> and Mg-CN-4%**
